# Supplementary material
Source: HighWire-hosted journal article supplement (https://jnm.snmjournals.org/highwire/filestream/95094/field_highwire_adjunct_files/0/188789_Supplemental_Data.pdf)
Supplement: 188789_Supplemental_Data.pdf [file 188789_Supplemental_Data.pdf]

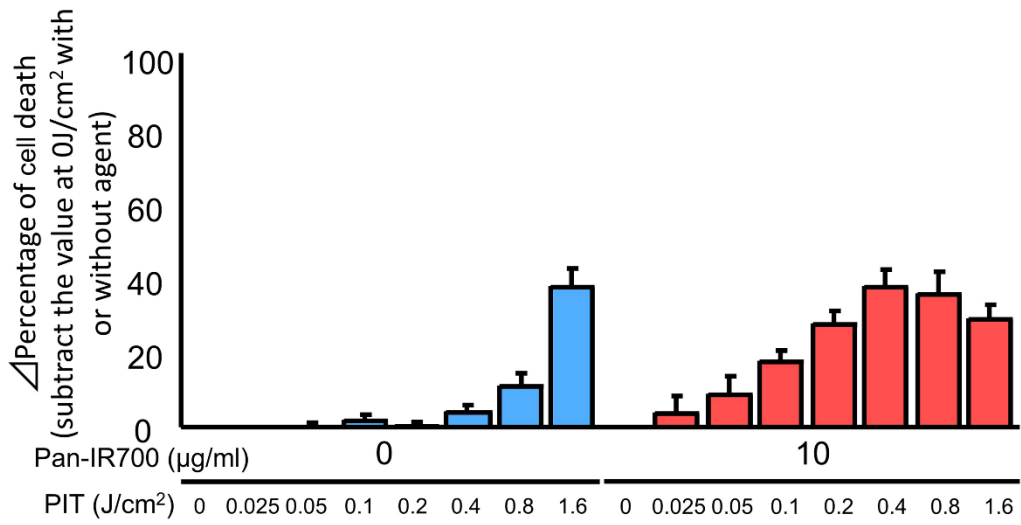

Supplemental Fig. 1

Δ percentage of surviving cells, the difference between the value without UV-A light with or without pan-IR700, increased in a light dose dependent manner with pan-IR700.

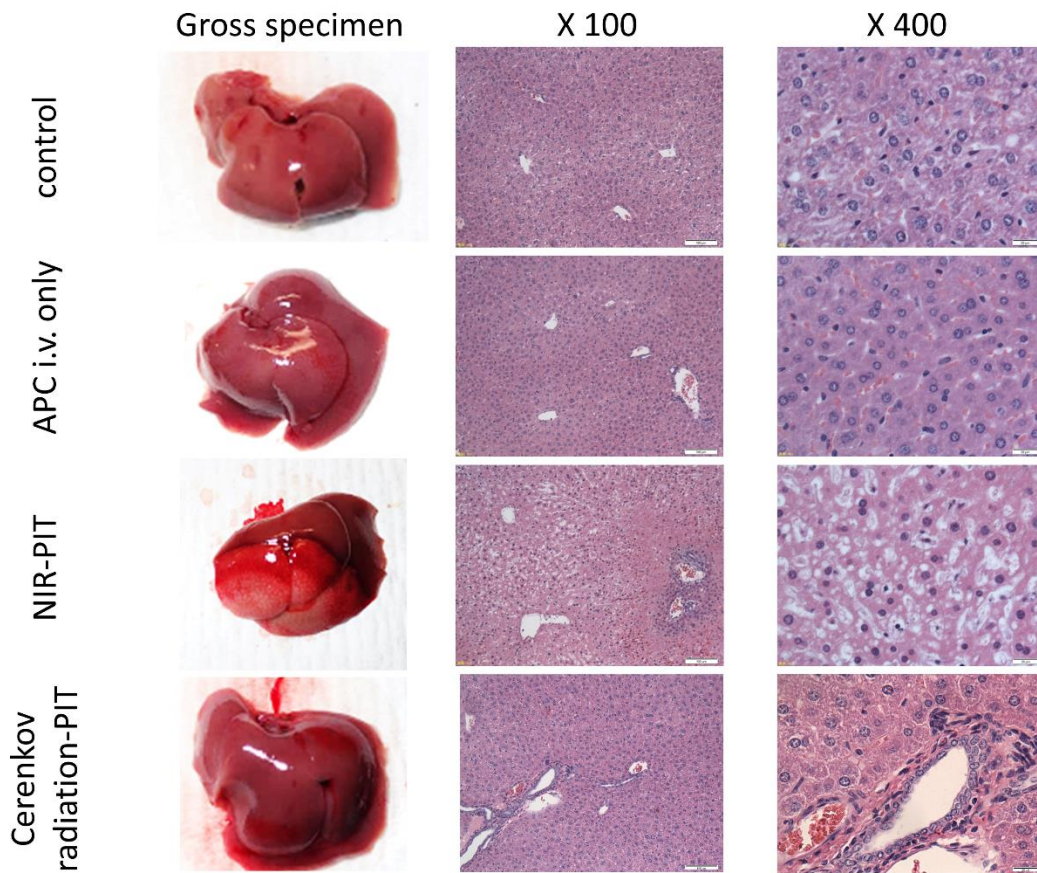

Supplemental Fig. 2

Gross specimen and microscopic images stained with hematoxylin and eosin of extracted livers. In liver treated with NIR-PIT color in the irradiated area was changed in white macroscopically. In addition, obvious hepatic cell damage was confirmed microscopically. On the other hand, in liver treated with CR-PIT mild hepatic cell damage was confirmed in peri-Glisson's capsule area although there

was no obvious change in gross appearance. No obvious damage was observed in livers in the APC i.v. only and control groups.
